# Supplementary material for: Distribution and Genetic Lineages of the Craspedacusta sowerbii Species Complex (Cnidaria, Olindiidae) in Italy
Source: MDPI journal article supplement (doi:10.3390/biology13040202), 2024-03-22
Supplement: s1 [file s1]

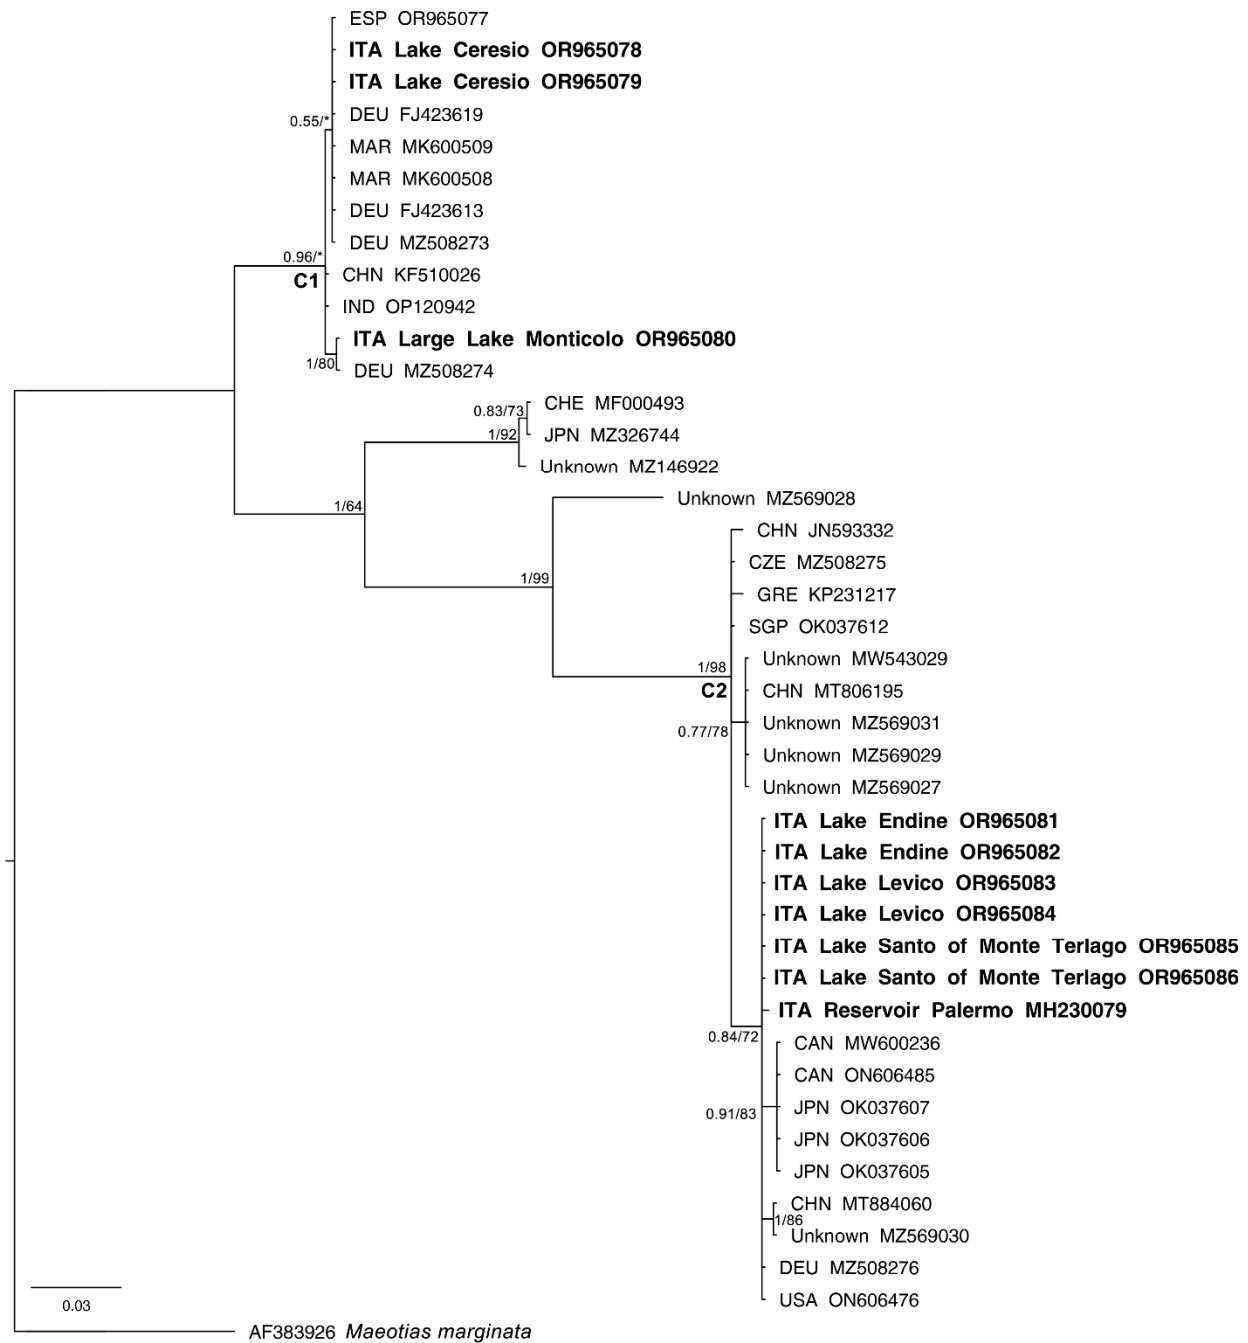

**Figure S1:** Bayesian phylogram of published and collected *Craspedacusta* specimens based on the mtDNA COI "partial dataset". *Maeotias marginata* was used as an outgroup to root the tree. Node statistical support is reported as nodal posterior probabilities (Bayesian Inference of phylogeny, BI)/bootstrap values (maximum likelihood, ML). Asterisks show support values lower than 50. Italian sequences are reported in bold. CAN, Canada; CHE, Switzerland; CHN, China; CZE, Czech Republic; DEU, Germany; ESP, Spain; GRE, Greece; IND, India; **ITA**, Italy; JPN, Japan; MAR, Morocco; SGP, Singapore.

**Table S1.** *Craspedacusta* mtDNA COI “complete” dataset alignment.

|                                                                                                                                                                                                                                                                                                |
|------------------------------------------------------------------------------------------------------------------------------------------------------------------------------------------------------------------------------------------------------------------------------------------------|
| >ESP_OR965077<br>GGACCTTCAGTAGACATGGCCATCTTTAGCCTTCATGCGGCAGGTGCTTCCTCCATCATGGGTTCATGAATTTCACTACTATTTTCAACATGAGAGCACCAGGAATGA<br>CCATGGATCGCGTTCCTCTTCGTTTGAGCTGTACTCATACGGCATTCTTTAGTTCTCTCTTTGCCCGTCTTAGCTGGAGCCATTACTATGTTACTAACTGATCGTAACT<br>TTAATACCA                                    |
| >ITA_Lake_Ceresio_OR965078<br>GGACCTTCAGTAGACATGGCCATCTTTAGCCTTCATGCGGCAGGTGCTTCCTCCATCATGGGTTCATGAATTTCACTACTATTTTCAACATGAGAGCACCAGGAATGA<br>CCATGGATCGCGTTCCTCTTCGTTTGAGCTGTACTCATACGGCATTCTTTAGTTCTCTCTTTGCCCGTCTTAGCTGGAGCCATTACTATGTTACTAACTGATCGTAACT<br>TTAATACCA                       |
| >ITA_Lake_Ceresio_OR965079<br>GGACCTTCAGTAGACATGGCCATCTTTAGCCTTCATGCGGCAGGTGCTTCCTCCATCATGGGTTCATGAATTTCACTACTATTTTCAACATGAGAGCACCAGGAATGA<br>CCATGGATCGCGTTCCTCTTCGTTTGAGCTGTACTCATACGGCATTCTTTAGTTCTCTCTTTGCCCGTCTTAGCTGGAGCCATTACTATGTTACTAACTGATCGTAACT<br>TTAATACCA                       |
| >ITA_Large_Lake_Monticolo_OR965080<br>GGACCTTCAGTAGACATGGCCATCTTTAGCCTTCATGCGGCAGGTGCTTCCTCCATCATGGGTTCATGAATTTCACTACTATCTTCAACATGAGAGCACCAGGAATGA<br>CCATGGATCGCGTTCCTCTTCGTTTGAGCCGTACTCATACGGCATTCTTTAGTTCTCTCTTTGCCCGTCTTAGCTGGAGCCATTACTATGTTACTAACTGATCGTAACT<br>TTAATACCA               |
| >ITA_Lake_Endine_OR965081<br>GGACCTTCCGTGGATATGGCCATCTTTAGCCTTCATGCGGCCGGTGCCCTCTTCTATCATGGGATCCATGAATTCATCACCACCATCTTAAACATGAGAGCCCCAGGGATGA<br>CCATGGATCGCGTTCCTCTCTTCGTTGAGCCAGTGCTAATACGGCCTTCCTTCTGGTTCTATCTCTTCCCGTCTTAGCAGGAGCCATCACCATGCTACTACGGACCGTAA<br>CTTCAACACCA                 |
| >ITA_Lake_Endine_OR965082<br>GGACCTTCCGTGGATATGGCCATCTTTAGCCTTCATGCGGCCGGTGCCCTCTTCTATCATGGGATCCATGAATTCATCACCACCATCTTAAACATGAGAGCCCCAGGGATGA<br>CCATGGATCGCGTTCCTCTCTTCGTTGAGCCAGTGCTAATACGGCCTTCCTTCTGGTTCTATCTCTTCCCGTCTTAGCAGGAGCCATCACCATGCTACTACGGACCGTAA<br>CTTCAACACCA                 |
| >ITA_Lake_Levico_OR965083<br>GGACCTTCCGTGGATATGGCCATCTTTAGCCTTCATGCGGCCGGTGCCCTCTTCTATCATGGGATCCATGAATTCATCACCACCATCTTAAACATGAGAGCCCCAGGGATGA<br>CCATGGATCGCGTTCCTCTCTTCGTTGAGCCAGTGCTAATACGGCCTTCCTTCTGGTTCTATCTCTTCCCGTCTTAGCAGGAGCCATCACCATGCTACTACGGACCGTAA<br>CTTCAACACCA                 |
| >ITA_Lake_Levico_OR965084<br>GGACCTTCCGTGGATATGGCCATCTTTAGCCTTCATGCGGCCGGTGCCCTCTTCTATCATGGGATCCATGAATTCATCACCACCATCTTAAACATGAGAGCCCCAGGGATGA<br>CCATGGATCGCGTTCCTCTCTTCGTTGAGCCAGTGCTAATACGGCCTTCCTTCTGGTTCTATCTCTTCCCGTCTTAGCAGGAGCCATCACCATGCTACTACGGACCGTAA<br>CTTCAACACCA                 |
| >ITA_Lake_Santo_of_Monte_Terlago_OR965085<br>GGACCTTCCGTGGATATGGCCATCTTTAGCCTTCATGCGGCCGGTGCCCTCTTCTATCATGGGATCCATGAATTCATCACCACCATCTTAAACATGAGAGCCCCAGGGATGA<br>CCATGGATCGCGTTCCTCTCTTCGTTGAGCCAGTGCTAATACGGCCTTCCTTCTGGTTCTATCTCTTCCCGTCTTAGCAGGAGCCATCACCATGCTACTACGGACCGTAA<br>CTTCAACACCA |
| >ITA_Lake_Santo_of_Monte_Terlago_OR965086<br>GGACCTTCCGTGGATATGGCCATCTTTAGCCTTCATGCGGCCGGTGCCCTCTTCTATCATGGGATCCATGAATTCATCACCACCATCTTAAACATGAGAGCCCCAGGGATGA<br>CCATGGATCGCGTTCCTCTCTTCGTTGAGCCAGTGCTAATACGGCCTTCCTTCTGGTTCTATCTCTTCCCGTCTTAGCAGGAGCCATCACCATGCTACTACGGACCGTAA<br>CTTCAACACCA |
| >ITA_Lake_Albanò_SAMEA114653644<br>GGACCTTCAGTAGACATGGCCATCTTTAGCCTTCATGCGGCAGGTGCTTCCTCCATCATGGGTTCATGAATTTCACTACTATCTTCAACATGAGAGCACCAGGAATGA<br>CCATGGATCGCGTTCCTCTTCGTTTGAGCCGTACTCATACGGCATTCTTTAGTTCTCTCTTTGCCCGTCTTAGCTGGAGCCATTACTATGTTACTAACTGATCGTAACT<br>TTAATACCA                  |
| >ITA_Lake_Garda_SAMEA114653646<br>GGACCTTCAGTAGACATGGCCATCTTTAGCCTTCATGCGGCAGGTGCTTCCTCCATCATGGGTTCATGAATTTCACTACTATCTTCAACATGAGAGCACCAGGAATGA<br>CCATGGATCGCGTTCCTCTTCGTTTGAGCCGTACTCATACGGCATTCTTTAGTTCTCTCTTTGCCCGTCTTAGCTGGAGCCATTACTATGTTACTAACTGATCGTAACT<br>TTAATACCA                   |
| >ITA_Lake_Garda_SAMEA114653647<br>GGACCTTCAGTAGACATGGCCATCTTTAGCCTTCATGCGGCAGGTGCTTCCTCCATCATGGGTTCATGAATTTCACTACTATTTTCAACATGAGAGCACCAGGAATGA<br>CCATGGATCGCGTTCCTCTTCGTTTGAGCTGTACTCATACGGCATTCTTTAGTTCTCTCTTTGCCCGTCTTAGCTGGAGCCATTACTATGTTACTAACTGATCGTAACT<br>TTAATACCA                   |
| >ITA_Lake_Maggiore_PRJNA909627<br>GGACCTTCAGTAGACATGGCCATCTTTAGCCTTCATGCGGCAGGTGCTTCCTCCATCATGGGTTCATGAATTTCACTACTATTTTCAACATGAGAGCACCAGGAATGA<br>CCATGGATCGCGTTCCTCTTCGTTTGAGCTGTACTCATACGGCATTCTTTAGTTCTCTCTTTGCCCGTCTTAGCTGGAGCCATTACTATGTTACTAACTGATCGTAACT<br>TTAATACCA                   |
| >ITA_Reservoir_Palermo_MH230079<br>GGACCTTCCGTGGATATGGTCATCTTTAGCCTTCATGCGGCCGGTGCCCTCTTCTATCATGGGATCCATGAATTCATCACCACCATCTTAAACATGAGAGCCCCAGGGATGA<br>CCATGGATCGCGTTCCTCTCTTCGTTGAGCCAGTGCTAATACGGCCTTCCTTCTGGTTCTATCTCTTCCCGTCTTAGCAGGAGCCATCACCATGCTACTACGGACCGTAA<br>CTTCAACACCA           |
| >DEU_MZ508274<br>GGACCTTCAGTAGACATGGCCATCTTTAGCCTTCATGCGGCAGGTGCTTCCTCCATCATGGGTTCATGAATTTCACTACTATCTTCAACATGAGAGCACCAGGAATGA<br>CCATGGATCGCGTTCCTCTTCGTTTGAGCCGTACTCATACGGCATTCTTTAGTTCTCTCTTTGCCCGTCTTAGCTGGAGCCATTACTATGTTACTAACTGATCGTAACT<br>TTAATACCA                                    |
| >IND_OP120942<br>GGACCTTCAGTAGACATGGCCATCTTTAGCCTTCATGCGGCAGGTGCTTCCTCCATCATGGGTTCATGAATTTCACTACTATCTTCAACATGAGAGCACCAGGAATGA<br>CCATGGATCGCGTTCCTCTTCGTTTGAGCTGTACTCATACGGCATTCTTTAGTTCTCTCTTTGCCCGTCTTAGCTGGAGCCATTACTATGTTACTAACTGATCGTAACT<br>TTAATACCA                                    |
| >DEU_FJ423619<br>GGACCTTCAGTAGACATGGCCATCTTTAGCCTTCATGCGGCAGGTGCTTCCTCCATCATGGGTTCATGAATTTCACTACTATTTTCAACATGAGAGCACCAGGAATGA<br>CCATGGATCGCGTTCCTCTTCGTTTGAGCTGTACTCATACGGCATTCTTTAGTTCTCTCTTTGCCCGTCTTAGCTGGAGCCATTACTATGTTACTAACTGATCGTAACT<br>TTAATACCA                                    |
| >MAR_MK600509<br>GGACCTTCAGTAGACATGGCCATCTTTAGCCTTCATGCGGCAGGTGCTTCCTCCATCATGGGTTCATGAATTTCACTACTATTTTCAACATGAGAGCACCAGGAATGA<br>CCATGGATCGCGTTCCTCTTCGTTTGAGCTGTACTCATACGGCATTCTTTAGTTCTCTCTTTGCCCGTCTTAGCTGGAGCCATTACTATGTTACTAACTGATCGTAACT<br>TTAATACCA                                    |
| >MAR_MK600508<br>GGACCTTCAGTAGACATGGCCATCTTTAGCCTTCATGCGGCAGGTGCTTCCTCCATCATGGGTTCATGAATTTCACTACTATTTTCAACATGAGAGCACCAGGAATGA<br>CCATGGATCGCGTTCCTCTTCGTTTGAGCTGTACTCATACGGCATTCTTTAGTTCTCTCTTTGCCCGTCTTAGCTGGAGCCATTACTATGTTACTAACTGATCGTAACT<br>TTAATACCA                                    |
| >CHN_KF510026<br>GGACCTTCAGTAGACATGGCCATCTTTAGCCTTCATGCGGCAGGTGCTTCCTCCATCATGGGTTCATGAATTTCACTACTATCTTCAACATGAGAGCACCAGGAATGA                                                                                                                                                                  |

|                                                                                                                                                                                                                                                                |
|----------------------------------------------------------------------------------------------------------------------------------------------------------------------------------------------------------------------------------------------------------------|
| CCATGGATCGCGTTCCTCTTCGTTTGAGCTGTACTCATCACGGCATTCTTTAGTTCTCTCTTTGCCGCTTAGCTGGAGCCATTACTATGTTACTAACTGATCGTAACTTAAATACCA                                                                                                                                          |
| >CHE_MF000493<br>GGCCCTCGGTAGACATGGCCATCTTCAGTCTTCATGCGGCAGGTGCTTCCTCGATCATGGGTTCCATGAACCTTCATCACCACCATCTTTAACATGAGAGCCCCAGGAATGACGATGGATCGCGTACCTCTGTTCTGTGAGCCGTACTCATCACGCCCTTCCTTTAGTTCTGTCTTTACCCGTTTAGCTGGAGCCATTACCATGTTGTTGACAGATCGTAA TTCAATACGA      |
| >Unknown_MW543029<br>GGACCTTCCGTGGATATGGCCATCTTAGCCTTCATGCGGCCGGTGCCCTCTATCATGGGATCCATGAACCTTCATCACCACCATCTTTAACATGAGAGCCCCAGGGATGACCATGGATCGCGTTCCTCTCTTCGTCTGGGCAGTACTAATCACGGCCTTCCTTCTGGTTCTATCTCTCCCGCTTAGCAGGGGCCATCACCATGCTACTCACGGACCGTAACITCAACACCA   |
| >CAN_MW600236<br>GGACCTTCCGTGGATATGGCCATCTTAGCCTTCATGCGGCCGGTGCCCTCTTCATCATGGGATCCATGAACCTTCATCACCACCATCTTTAACATGAGAGCCCCAGGGATGACCATGGATCGCGTTCCTCTCTTCGTCTGAGCAGTGCTAATCACGGCCTTCCTTCTGGTTCTATCTCTCCCGCTTAGCAGGAGCCATCACCATGCTACTCACGGACCGTAACTTCAACACCA     |
| >CAN_ON606485<br>GGACCTTCCGTGGATATGGCCATCTTAGCCTTCATGCGGCCGGTGCCCTCTTCATCATGGGATCCATGAACCTTCATCACCACCATCTTTAACATGAGAGCCCCAGGGATGACCATGGATCGCGTTCCTCTCTTCGTCTGAGCAGTGCTAATCACGGCCTTCCTTCTGGTTCTATCTCTCCCGCTTAGCAGGAGCCATCACCATGCTACTCACGGACCGTAACTTCAACACCA     |
| >SGP_OK037612<br>GGACCTTCCGTGGATATGGCCATCTTAGCCTTCATGCGGCCGGTGCCCTCTTCATCATGGGATCCATGAACCTTCATCACCACCATCTTTAACATGAGAGCCCCAGGGATGACCATGGATCGCGTTCCTCTCTTCGTCTGGGCAGTACTAATCACGGCCTTCCTTCTGGTTCTATCTCTCCCGCTTAGCAGGAGCCATCACCATGCTACTCACGGACCGTAACITCAACACCA     |
| >JPN_OK037607<br>GGACCTTCCGTGGATATGGCCATCTTAGCCTTCATGCGGCCGGTGCCCTCTTCATCATGGGATCCATGAACCTTCATCACCACCATCTTTAACATGAGAGCCCCAGGGATGACCATGGATCGCGTTCCTCTCTTCGTCTGAGCAGTGCTAATCACGGCCTTCCTTCTGGTTCTATCTCTCCCGCTTAGCAGGAGCCATCACCATGCTACTCACGGACCGTAACTTCAACACCA     |
| >CHN_MT806195<br>GGACCTTCCGTGGATATGGCCATCTTAGCCTTCATGCGGCCGGTGCCCTCTTCATCATGGGATCCATGAACCTTCATCACCACCATCTTTAACATGAGAGCCCCAGGGATGACCATGGATCGCGTTCCTCTCTTCGTCTGGGCAGTACTAATCACGGCCTTCCTTCTGGTTCTATCTCTCCCGCTTAGCAGGGGCCATCACCATGCTACTCACGGACCGTAACITCAACACCA     |
| >JPN_OK037606<br>GGACCTTCCGTGGATATGGCCATCTTAGCCTTCATGCGGCCGGTGCCCTCTTCATCATGGGATCCATGAACCTTCATCACCACCATCTTTAACATGAGAGCCCCAGGGATGACCATGGATCGCGTTCCTCTCTTCGTCTGAGCAGTGCTAATCACGGCCTTCCTTCTGGTTCTATCTCTCCCGCTTAGCAGGAGCCATCACCATGCTACTCACGGACCGTAACTTCAACACCA     |
| >JPN_OK037605<br>GGACCTTCCGTGGATATGGCCATCTTAGCCTTCATGCGGCCGGTGCCCTCTTCATCATGGGATCCATGAACCTTCATCACCACCATCTTTAACATGAGAGCCCCAGGGATGACCATGGATCGCGTTCCTCTCTTCGTCTGAGCAGTGCTAATCACGGCCTTCCTTCTGGTTCTATCTCTCCCGCTTAGCAGGAGCCATCACCATGCTACTCACGGACCGTAACTTCAACACCA     |
| >CHN_MT884060<br>GGACCTTCCGTGGATATGGCCATCTTAGCCTTCATGCGGCCGGTGCCCTCTTCATCATGGGATCCATGAACCTTCATCACCACCATCTTTAACATGAGAGCCCCAGGGATGACCATGGATCGCGTTCCTCTCTTCGTCTGGGCAGTGCTAATCACGGCCTTCCTTCTGGTTCTATCTCTCCCGCTTAGCAGGAGCCATCACCATGCTACTCACGGACCGTAACTTCAACACCA     |
| >GRE_KP231217<br>GGACCTTCCGTGGATATGGCCATCTTAGCCTTCATGCGGCCGGTGCCCTCTTCATCATGGGATCCATGAACCTTCATCACCACCATCTTTAACATGAGAGCCCCAGGGATGACCATGGATCGCGTTCCTCTCTTCGTCTGGGCAGTACTAATCACGGCCTTCCTTCTGGTTCTATCTCTCCCGCTTAGCAGGAGCCATCACCATACTACTCACGGACCGTAACITCAACACCA     |
| >DEU_FJ423613<br>GGACCTTCAGTAGACATGGCCATCTTAGCCTTCATGCGGCAGGTGCTTCCTCCATCATGGGTTCTATGAATTCATCACTACTATTTCAACATGAGAGCACCAGGAATGACCATGGATCGCGTTCCTCTCTTCGTTCGAGCTGTACTCATCACGGCATTCTTTAGTTCTCTCTTTGCCCGCTTAGCTGGAGCCATTACTATGTTACTAACTGATCGTAACTTAAATACCA         |
| >JPN_MZ326744<br>GGCCCTCGGTAGACATGGCCATCTTCAGTCTTCATGCGGCAGGTGCTTCCTCGATCATGGGTTCCATGAACCTTCATCACCACCATCTTTAACATGAGAGCCCCAGGAATGACGATGGATCGCGTACCTCTGTTCTGTGAGCCGTACTATCACAGCCTTCCTTTAGTTCTGTCTTTACCCGTTTAGCTGGAGCCATTACCATGTTGTTGACAGATCGTAA TTCAATACGA       |
| >Unknown_MZ146922<br>GGCCCTCGGTAGACATGGCCATCTTCAGTCTTCATGCGGCAGGTGCTTCCTCGATCATGGGTTCCATGAACCTTCATCACCACCATCTTTAACATGAGAGCCCCAGGAATGACGATGGATCGCGTACCTCTGTTCTGTGAGCCGTACTCATCACGCCCTTCCTTTAGTTCTGTCTTTACCCGTTTAGCTGGAGCCATTACCATGTTGTTGACAGATCGTAA TTCAATACGA  |
| >Unknown_MZ569028<br>GGGCTTCGGTAGACATGGCCATCTTCAGCCTTCACGCGGCTGGTGCCCTCTTCATCATGGGATCCATGAATTCATCACCACCATCTTTAACATGAGAGCCCCAGGGATGACGATGGATCGAGTCCCTCTCTTCGTTGAGCAGTGCTAATCACGGCCTTCCTGTTAGTCTCTCTACCCGTTTAGCGGGGGCCATCACCATGTGCTACGGATCGTAATTTCAACACCA        |
| >Unknown_MZ569031<br>GGACCTTCCGTGGATATGGCCATCTTAGCCTTCATGCGGCCGGTGCCCTCTTCATCATGGGATCCATGAACCTTCATCACCACCATCTTTAACATGAGAGCCCCAGGGATGACCATGGATCGCGTTCCTCTCTTCGTCTGGGCAGTACTAATCACGGCCTTCCTTCTGGTTCTATCTCTCCCGCTTAGCAGGGGCCATCACCATGCTACTCACGGACCGTAACITCAACACCA |
| >Unknown_MZ569029<br>GGACCTTCCGTGGATATGGCCATCTTAGCCTTCATGCGGCCGGTGCCCTCTTCATCATGGGATCCATGAACCTTCATCACCACCATCTTTAACATGAGAGCCCCAGGGATGACCATGGATCGCGTTCCTCTCTTCGTCTGGGCAGTACTAATCACGGCCTTCCTTCTGGTTCTATCTCTCCCGCTTAGCAGGGGCCATCACCATGCTACTCACGGACCGTAACITCAACACCA |
| >Unknown_MZ569027<br>GGACCTTCCGTGGATATGGCCATCTTAGCCTTCATGCGGCCGGTGCCCTCTTCATCATGGGATCCATGAACCTTCATCACCACCATCTTTAACATGAGAGCCCCAGGGATGACCATGGATCGCGTTCCTCTCTTCGTCTGGGCAGTACTAATCACGGCCTTCCTTCTGGTTCTATCTCTCCCGCTTAGCAGGGGCCATCACCATGCTACTCACGGACCGTAACITCAACACCA |
| >CZE_MZ508275<br>GGACCTTCCGTGGATATGGCCATCTTAGCCTTCATGCGGCCGGTGCCCTCTTCATCATGGGATCCATGAACCTTCATCACCACCATCTTTAACATGAGAGCCCCAGGGATGACCATGGATCGCGTTCCTCTCTTCGTCTGGGCAGTACTAATCACGGCCTTCCTTCTGGTTCTATCTCTCCCGCTTAGCAGGAGCCATCACCATGCTACTCACGGACCGTAACITCAACACCA     |
| >CHN_JN593332<br>GGACCTTCCGTGGATATGGCCATCTTAGCCTTCATGCGGCCGGTGCTTCCTCTTCATCATGGGATCCATGAACCTTCATCACCACCATCTTTAACATGAGAGCCCCAGGGATGACCATGGATCGCGTTCCTCTCTTCGTCTGGGCAGTACTAATCACGGCCTTCCTTCTGGTTCTATCTCTCCCGCTTAGCAGGAGCCATCACCATGCTACTCACGGACCGTAACTTCAACACCA   |
| >DEU_MZ508276<br>GGACCTTCCGTGGATATGGCCATCTTAGCCTTCATGCGGCCGGTGCCCTCTTCATCATGGGATCCATGAACCTTCATCACCACCATCTTTAACATGAGAGCCCCAGGGATGACCATGGATCGCGTTCCTCTCTTCGTCTGGGCAGTGCTAATCACGGCCTTCCTTCTGGTTCTATCTCTCCCGCTTAGCAGGAGCCATCACCATGCTACTCACGGACCGTAACTTCAACACCA     |

|                                                                                                                                                                                                                                                                                              |
|----------------------------------------------------------------------------------------------------------------------------------------------------------------------------------------------------------------------------------------------------------------------------------------------|
| <p>&gt;Unknown_MZ569030</p> <p>GGACCTTCCGTGGATATGGCCATCTTTAGCCTTCATGCGGCCGGTGCCCTCTTATCATGGGATCCATGAACCTTCATCACCACCATCTTTAACATGAGAGCCCCAGGGATGA<br/>CCATGGATCGCGTTCCTCTCTTCGTCTGGGCAGTGCTAATCACGGCCTTCCTCTGGTTCTATCTCTCCCGCTCTGGCAGGAGCCATCACCATGCTACTACGGACCGTAA<br/>CTTCAACACCA</p>        |
| <p>&gt;DEU_MZ508273</p> <p>GGACCTTCAGTAGACATGGCCATCTTTAGCCTTCATGCGGCAGGTGCTTCCTCCATCATGGGTCTATGAATTCATCACTACTATTTTCAACATGAGAGCACCAGGAATGA<br/>CCATGGATCGCGTTCCTCTCTTCGTTCGAGCTGACTCATCAGGCATTCTTTAGTTCTCTCTTTGCCCGTCTAGCTGGAGCCATTACTATGTTACTAACTGATCGTAACT<br/>TTAATACCA</p>                |
| <p>&gt;CHL_MF177101</p> <p>GGACCTTCCGTGGATATGGCCATCTTTAGCCTTCATGCGGCCGGTGCCCTCTTATCATGGGATCCATGAACCTTCATCACCACCATCTTTAACATGAGAGCCCCAGGGATGA<br/>CCATGGATCGCGTTCCTCTCTTCGTCTGGGCAGTGCTAATCACGGCCTTCCTCTGGTTCTATCTCTCCCGTCTTAGCAGGAGCCATCACCATGCTACTACGGACCGTAA<br/>CTTCAACACCA</p>            |
| <p>&gt;CHL_MF177111</p> <p>GGACCTTCCGTGGATATGGCCATCTTTAGCCTTCATGCGGCCGGTGCCCTCTTATCATGGGATCCATGAACCTTCATCACCACCATCTTTAACATGAGAGCCCCAGGGATGA<br/>CCATGGATCGCGTTCCTCTCTTCGTCTGGGCAGTGCTAATCACGGCCTTCCTCTGGTTCTATCTCTCCCGTCTTAGCAGGAGCCATCACCATGCTACTACGGACCGTAA<br/>CTTCAACACCA</p>            |
| <p>&gt;CHL_MF177121</p> <p>GGACCTTCCGTGGATATGGCCATCTTTAGCCTTCATGCGGCCGGTGCCCTCTTATCATGGGATCCATGAACCTTCATCACCACCATCTTTAACATGAGAGCCCCAGGGATGA<br/>CCATGGATCGCGTTCCTCTCTTCGTCTGGGCAGTGCTAATCACGGCCTTCCTCTGGTTCTATCTCTCCCGTCTTAGCAGGAGCCATCACCATGCTACTACGGACCGTAA<br/>CTTCAACACCA</p>            |
| <p>&gt;CHL_MF177131</p> <p>GGACCTTCCGTGGATATGGCCATCTTTAGCCTTCATGCGGCCGGTGCCCTCTTATCATGGGATCCATGAACCTTCATCACCACCATCTTTAACATGAGAGCCCCAGGGATGA<br/>CCATGGATCGCGTTCCTCTCTTCGTCTGGGCAGTGCTAATCACGGCCTTCCTCTGGTTCTATCTCTCCCGTCTTAGCAGGAGCCATCACCATGCTACTACGGACCGTAA<br/>CTTCAACACCA</p>            |
| <p>&gt;USA_ON606476</p> <p>GGACCTTCCGTGGATATGGCCATCTTTAGCCTTCATGCGGCCGGTGCCCTCTTATCATGGGATCCATGAACCTTCATCACCACCATCTTTAACATGAGAGCCCCAGGGATGA<br/>CCATGGATCGCGTTCCTCTCTTCGTCTGGGCAGTGCTAATCACGGCCTTCCTCTGGTTCTATCTCTCCCGTCTTAGCAGGAGCCATCACCATGCTACTACGGACCGTAA<br/>CTTCAACACCA</p>            |
| <p>&gt;AF383926_Maeotias_marginata</p> <p>GGACCTTCTGTAGATATGGCTATTTTATGCTTCATGCAGCCGGAGCTTCATCTATAATGGGATCTATGAATTCATTACTACCATTTTAAATATGAGAGCCCCAGGAATGACT<br/>ATGGATAGAGTTCCTTTGTTTGTATGAGCTGTTTAAATAACAGCTTTCTCTTTTATTATCCTTACCTGTCTTGCTGGAGCTAATCAATGTATTAACTGACCGTAATTTTAA<br/>TACAA</p> |

**Table S2.** *Craspedacusta* mtDNA COI “partial” dataset alignment.

|                                                                                                                                                                                                                                                                                                                                                                                                                                                                                                                                                                                                                                                        |
|--------------------------------------------------------------------------------------------------------------------------------------------------------------------------------------------------------------------------------------------------------------------------------------------------------------------------------------------------------------------------------------------------------------------------------------------------------------------------------------------------------------------------------------------------------------------------------------------------------------------------------------------------------|
| <p>&gt;ESP_OR965077</p> <p>GAACCGCTCTTAGCATGTTGATTGCTTAGAGCTTTCTGGACCAGGAGCTATGTTAGGAGATGACCAAATTTATAATGTCATCGTCACCGCTCATGCTTTCGTATGATCTT<br/>CTTCTTGGAATGCCTGTGATGATGGGTGGCTTCGGAAACTGATTCTGCTCCCTCTATATATAGGAGCTCCAGATATGGCATTTCTCGATTAAATAACCTCAGTTTTTGGCTTC<br/>TTCTTCCCGCCCTCTTTTGTATTAGGCTCTGCTTTAGTAGAACAAGGAGCAGGAACAGGTTGAACAGTCTACCCCCCACTTGCTGGAGTTCAAGCTCATTCCGGACCTT<br/>CAGTAGACATGGCCATCTTTAGCCTTCATGCGGCAGGTGCTTCCTCCATCATGGGTCTATGAATTCATCACTACTATTTTCAACATGAGAGCACCAGGAATGACCATGGA<br/>TCGCGTTCCCTCTTCGTTGAGCTGACTCATCAGGCATTCTTTAGTTCTCTCTTTGCCCGTCTTAGCTGGAGCCATTACTATGTTACTAACTGATCGTAACTTTAATAC<br/>CA</p>                       |
| <p>&gt;ITA_Lake_Ceresio_OR965078</p> <p>GAACCGCTCTTAGCATGTTGATTGCTTAGAGCTTTCTGGACCAGGAGCTATGTTAGGAGATGACCAAATTTATAATGTCATCGTCACCGCTCATGCTTTCGTATGATCTT<br/>CTTCTTGGAATGCCTGTGATGATGGGTGGCTTCGGAAACTGATTCTGCTCCCTCTATATATAGGAGCTCCAGATATGGCATTTCTCGATTAAATAACCTCAGTTTTTGGCTTC<br/>TTCTTCCCGCCCTCTTTTGTATTAGGCTCTGCTTTAGTAGAACAAGGAGCAGGAACAGGTTGAACAGTCTACCCCCCACTTGCTGGAGTTCAAGCTCATTCCGGACCTT<br/>CAGTAGACATGGCCATCTTTAGCCTTCATGCGGCAGGTGCTTCCTCCATCATGGGTCTATGAATTCATCACTACTATTTTCAACATGAGAGCACCAGGAATGACCATGGA<br/>TCGCGTTCCCTCTTCGTTGAGCTGACTCATCAGGCATTCTTTAGTTCTCTCTTTGCCCGTCTTAGCTGGAGCCATTACTATGTTACTAACTGATCGTAACTTTAATAC<br/>CA</p>          |
| <p>&gt;ITA_Lake_Ceresio_OR965079</p> <p>GAACCGCTCTTAGCATGTTGATTGCTTAGAGCTTTCTGGACCAGGAGCTATGTTAGGAGATGACCAAATTTATAATGTCATCGTCACCGCTCATGCTTTCGTATGATCTT<br/>CTTCTTGGAATGCCTGTGATGATGGGTGGCTTCGGAAACTGATTCTGCTCCCTCTATATATAGGAGCTCCAGATATGGCATTTCTCGATTAAATAACCTCAGTTTTTGGCTTC<br/>TTCTTCCCGCCCTCTTTTGTATTAGGCTCTGCTTTAGTAGAACAAGGAGCAGGAACAGGTTGAACAGTCTACCCCCCACTTGCTGGAGTTCAAGCTCATTCCGGACCTT<br/>CAGTAGACATGGCCATCTTTAGCCTTCATGCGGCAGGTGCTTCCTCCATCATGGGTCTATGAATTCATCACTACTATTTTCAACATGAGAGCACCAGGAATGACCATGGA<br/>TCGCGTTCCCTCTTCGTTGAGCTGACTCATCAGGCATTCTTTAGTTCTCTCTTTGCCCGTCTTAGCTGGAGCCATTACTATGTTACTAACTGATCGTAACTTTAATAC<br/>CA</p>          |
| <p>&gt;ITA_Large_Lake_Monticolo_OR965080</p> <p>GAACCGCTCTTAGCATGTTGATTGCTTAGAGCTTTCTGGACCAGGAGCTATGTTAGGAGATGACCAAATTTATAATGTCATCGTCACCGCTCATGCTTTCGTATGATCTT<br/>CTTCTTGGAATGCCTGTGATGATGGGTGGCTTCGGAAACTGATTCTGCTCCCTCTATATATAGGAGCTCCAGATATGGCATTTCTCGATTAAATAACCTCAGTTTTTGGCTTC<br/>TTCTTCCCGCCCTCTTTTGTATTAGGCTCTGCTTTAGTAGAACAAGGAGCAGGAACAGGTTGAACAGTCTACCCCCCACTTGCTGGAGTTCAAGCTCATTCCGGACCTT<br/>CAGTAGACATGGCCATCTTTAGCCTTCATGCGGCAGGTGCTTCCTCCATCATGGGTCTATGAATTCATCACTACTATCTTCAACATGAGAGCACCAGGAATGACCATGGA<br/>ATCGCGTTCCTCTTCGTTGAGCGGACTCATCAGGCATTCTTTAGTTCTCTCTTTGCCCGTCTTAGCTGGAGCGATTACTATGTTACTAACTGATCGTAACTTTAATAC<br/>CCA</p> |
| <p>&gt;ITA_Lake_Endine_OR965081</p> <p>GAACCGCCCTTAGCATGCTTATTGCTTGGAACTATCGGACCAGGAGCCATGCTAGGAGACGATCAGATCTACAACGTCATCGTCACTGCTACGCTTTCGTATGATTT<br/>TCTTCTTGTCATGCCGTAATGATGGGTGGATTTCGGAAACTGATTCTGCTCCCTCTTACATCGGAGCGCCAGACATGGCCTTTCCTCGATTAAACAACCTCAGTTTCTGACT<br/>CCTTCTCTGCTGCTCTCTTATTGCTTGGGTTCGCTTTAGTGGAACAAGGAGCAGGTACAGGTTGGACGGTCTATCCCCCTCTTGCCGGAGTTCAAGGCCACTCCGGACC<br/>TTCCGTGGATATGGCCATCTTTAGCCTTCATGCGGCCGGTGCCCTCTTCTATCATGGGATCCATGAACCTTCATCACCACCATCTTTAACATGAGAGCCCCAGGGATGACCATG<br/>GATCGGTTCTCTCTTCGTCTGGGCAGTGCTAATCAGGCCTTCCTTCTGGTTCTATCTCTTCCCGTCTTAGCAGGAGCCATCACCATGCTACTACGGACCGTAACTTCA<br/>ACACCA</p>       |
| <p>&gt;ITA_Lake_Endine_OR965082</p> <p>GAACCGCCCTTAGCATGCTTATTGCTTGGAACTATCGGACCAGGAGCCATGCTAGGAGACGATCAGATCTACAACGTCATCGTCACTGCTACGCTTTCGTATGATTT<br/>TCTTCTTGTCATGCCGTAATGATGGGTGGATTTCGGAAACTGATTCTGCTCCCTCTTACATCGGAGCGCCAGACATGGCCTTTCCTCGATTAAACAACCTCAGTTTCTGACT<br/>CCTTCTCTGCTGCTCTCTTATTGCTTGGGTTCGCTTTAGTGGAACAAGGAGCAGGTACAGGTTGGACGGTCTATCCCCCTCTTGCCGGAGTTCAAGGCCACTCCGGACC<br/>TTCCGTGGATATGGCCATCTTTAGCCTTCATGCGGCCGGTGCCCTCTTCTATCATGGGATCCATGAACCTTCATCACCACCATCTTTAACATGAGAGCCCCAGGGATGACCATG<br/>GATCGGTTCTCTCTTCGTCTGGGCAGTGCTAATCAGGCCTTCCTTCTGGTTCTATCTCTTCCCGTCTTAGCAGGAGCCATCACCATGCTACTACGGACCGTAACTTCA<br/>ACACCA</p>       |
| <p>&gt;ITA_Lake_Levico_OR965083</p> <p>GAACCGCCCTTAGCATGCTTATTGCTTGGAACTATCGGACCAGGAGCCATGCTAGGAGACGATCAGATCTACAACGTCATCGTCACTGCTACGCTTTCGTATGATTT<br/>TCTTCTTGTCATGCCGTAATGATGGGTGGATTTCGGAAACTGATTCTGCTCCCTCTTACATCGGAGCGCCAGACATGGCCTTTCCTCGATTAAACAACCTCAGTTTCTGACT<br/>CCTTCTCTGCTGCTCTCTTATTGCTTGGGTTCGCTTTAGTGGAACAAGGAGCAGGTACAGGTTGGACGGTCTATCCCCCTCTTGCCGGAGTTCAAGGCCACTCCGGACC<br/>TTCCGTGGATATGGCCATCTTTAGCCTTCATGCGGCCGGTGCCCTCTTCTATCATGGGATCCATGAACCTTCATCACCACCATCTTTAACATGAGAGCCCCAGGGATGACCATG<br/>GATCGGTTCTCTCTTCGTCTGGGCAGTGCTAATCAGGCCTTCCTTCTGGTTCTATCTCTTCCCGTCTTAGCAGGAGCCATCACCATGCTACTACGGACCGTAACTTCA<br/>ACACCA</p>       |

|                                                                                                                                                                                                                                                                                                                                                                                                                                                                                                                                                                                                                                                      |
|------------------------------------------------------------------------------------------------------------------------------------------------------------------------------------------------------------------------------------------------------------------------------------------------------------------------------------------------------------------------------------------------------------------------------------------------------------------------------------------------------------------------------------------------------------------------------------------------------------------------------------------------------|
| <p>&gt;ITA_Lake_Levico_OR965084</p> <p>GAACCGCCCTTAGCATGCTTATTGCTTGGAACTATCGGGACCGGGAGCCATGCTAGGAGACGATCAGATCTACAACGTCATCGTCACTGCTCAGCGTTTCGTCATGATTTCTTCTTGGTCAATGCCGGAATGATGGGTGGATTTCGGAAACTGATTGCTCCCTCTTTACATCGGAGCGCCAGACATGGCCTTTCCTCGATTAAACAACCTCAGTTTCTGACTCCTTCCTCCTGCCCTCTTCTTATTGCTTGGGTTCGGCTTTAGTGGAAACAAGGAGCAGGTACAGGTTGGACGGTCTATCCCCCTCTTGCCGGAGTTTCAAGGCCACTCCGGACC TTCCGTGGATATGGCCATCTTTAGCCTTCATGCGGCCGGTGCCCTCTTCTATCATGGGATCCATGAACCTTCATCACCACCATCTTTAACATGAGAGCCCCAGGGATGACCATG GATCGGTTCCCTCTCTTCGTCTGGGAGTGCTAATCACGGCCTTCCTTCTGGTTCATCTCTTCCCGTCTTAGCAGGAGCCATCACCATGCTACTCAGGACCGTAACCTCA ACACCA</p>                  |
| <p>&gt;ITA_Lake_Santo_of_Monte_Terlago_OR965085</p> <p>GAACCGCCCTTAGCATGCTTATTGCTTGGAACTATCGGGACCGGGAGCCATGCTAGGAGACGATCAGATCTACAACGTCATCGTCACTGCTCAGCGTTTCGTCATGATTTCTTCTTGGTCAATGCCGGAATGATGGGTGGATTTCGGAAACTGATTGCTCCCTCTTTACATCGGAGCGCCAGACATGGCCTTTCCTCGATTAAACAACCTCAGTTTCTGACT CCTTCCTCCTGCCCTCTTCTTATTGCTTGGGTTCGGCTTTAGTGGAAACAAGGAGCAGGTACAGGTTGGACGGTCTATCCCCCTCTTGCCGGAGTTTCAAGGCCACTCCGGACC TTCCGTGGATATGGCCATCTTTAGCCTTCATGCGGCCGGTGCCCTCTTCTATCATGGGATCCATGAACCTTCATCACCACCATCTTTAACATGAGAGCCCCAGGGATGACCATG GATCGGTTCCCTCTCTTCGTCTGGGAGTGCTAATCACGGCCTTCCTTCTGGTTCATCTCTTCCCGTCTTAGCAGGAGCCATCACCATGCTACTCAGGACCGTAACCTCA ACACCA</p> |
| <p>&gt;ITA_Lake_Santo_of_Monte_Terlago_OR965086</p> <p>GAACCGCCCTTAGCATGCTTATTGCTTGGAACTATCGGGACCGGGAGCCATGCTAGGAGACGATCAGATCTACAACGTCATCGTCACTGCTCAGCGTTTCGTCATGATTTCTTCTTGGTCAATGCCGGAATGATGGGTGGATTTCGGAAACTGATTGCTCCCTCTTTACATCGGAGCGCCAGACATGGCCTTTCCTCGATTAAACAACCTCAGTTTCTGACT CCTTCCTCCTGCCCTCTTCTTATTGCTTGGGTTCGGCTTTAGTGGAAACAAGGAGCAGGTACAGGTTGGACGGTCTATCCCCCTCTTGCCGGAGTTTCAAGGCCACTCCGGACC TTCCGTGGATATGGCCATCTTTAGCCTTCATGCGGCCGGTGCCCTCTTCTATCATGGGATCCATGAACCTTCATCACCACCATCTTTAACATGAGAGCCCCAGGGATGACCATG GATCGGTTCCCTCTCTTCGTCTGGGAGTGCTAATCACGGCCTTCCTTCTGGTTCATCTCTTCCCGTCTTAGCAGGAGCCATCACCATGCTACTCAGGACCGTAACCTCA ACACCA</p> |
| <p>&gt;ITA_Reservoir_Palermo_MH230079</p> <p>GAACCGCCCTTAGCATGCTTATTGCTTGGAACTATCGGGACCGGGAGCCATGCTAGGAGACGATCAGATCTACAACGTCATCGTCACTGCTCAGCGTTTCGTCATGATTTCTTCTTGGTCAATGCCGGAATGATGGGTGGATTTCGGAAACTGATTGCTCCCTCTTTACATCGGAGCGCCAGACATGGCCTTTCCTCGATTAAACAACCTCAGTTTCTGACT CCTTCCTCCTGCCCTCTTCTTATTGCTTGGGTTCGGCTTTAGTGGAAACAAGGAGCAGGTACAGGTTGGACGGTCTATCCCCCTCTTGCCGGAGTTTCAAGGCCACTCCGGACC TTCCGTGGATATGGTCAATCTTTAGCCTTCATGCGGCCGGTGCCCTCTTCTATCATGGGATCCATGAACCTTCATCACCACCATCTTTAACATGAGAGCCCCAGGGATGACCATG GATCGGTTCCCTCTCTTCGTCTGGGAGTGCTAATCACGGCCTTCCTTCTGGTTCATCTCTTCCCGTCTTAGCAGGAGCCATCACCATGCTACTCAGGACCGTAACCTCA ACACCA</p>          |
| <p>&gt;DEU_MZ508274</p> <p>GAACCGCTCTTAGCATGTTGATTGCTTAGAGCTTTCTGGACCAGGAGCTATGTTAGGAGATGACCAAATTTATAATGTCATCGTCAACCGCTCATGCTTTCGTCATGATCTTCTTCTTGGTAATGCCCTGTGATGATGGGTGGCTTCGGAAACTGATTGCTCCCTCTATATATAGGAGCTCCAGATATGGCATTTCCTCGATTAAATAACCTCAGTTTTCGGCTTC TTCTCCCGCCCTCTTTTGTATTAGGCTCTGCTTTAGTAGAACAAGGAGCAGGAACAGGTTGAACAGTCTACCCCCCACTTGCTGGAGTTCAAGCTCATTCCGGACCTT CAGTAGACATGGCCATCTTTAGCCTTCATGCGGCAGGTGCTTCCTCCATCATGGGTTCTATGAATTTTCATCACTACTATCTTCAACATGAGAGCACCAGGAATGACCATGG ATCGGTTCCCTCTTCGTTTGAGCCGTAATCATACGGCAATTCCTTTAGTTCTCTCTTTGCCCGTCTTAGCTGGAGCCATTACTATGTTACTAACTGATCGTAACTTTAATA CCA</p>                                  |
| <p>&gt;IND_OP120942</p> <p>GAACCGCTCTTAGCATGTTGATTGCTTAGAGCTTTCTGGACCAGGAGCTATGTTAGGAGATGACCAAATTTATAATGTCATCGTCAACCGCTCATGCTTTCGTCATGATCTTCTTCTTGGTAATGCCCTGTGATGATGGGTGGCTTCGGAAACTGATTGCTCCCTCTATATATAGGAGCTCCAGATATGGCATTTCCTCGATTAAATAACCTCAGTTTTCGGCTTC TTCTCCCGCCCTCTTTTGTATTAGGCTCTGCTTTAGTAGAACAAGGAGCAGGAACAGGTTGAACAGTCTACCCCCCACTTGCTGGAGTTCAAGCTCATTCCGGACCTT CAGTAGACATGGCCATCTTTAGCCTTCATGCGGCAGGTGCTTCCTCCATCATGGGTTCTATGAATTTTCATCACTACTATCTTCAACATGAGAGCACCAGGAATGACCATGG ATCGGTTCCCTCTTCGTTTGAGCTGTACTATCATACGGCAATTCCTTTAGTTCTCTCTTTGCCCGTCTTAGCTGGAGCCATTACTATGTTACTAACTGATCGTAACTTTAATA CCA</p>                                |
| <p>&gt;DEU_FJ423619</p> <p>GAACCGCTCTTAGCATGTTGATTGCTTAGAGCTTTCTGGACCAGGAGCTATGTTAGGAGATGACCAAATTTATAATGTCATCGTCAACCGCTCATGCTTTCGTCATGATCTTCTTCTTGGTAATGCCCTGTGATGATGGGTGGCTTCGGAAACTGATTGCTCCCTCTATATATAGGAGCTCCAGATATGGCATTTCCTCGATTAAATAACCTCAGTTTTCGGCTTC TTCTCCCGCCCTCTTTTGTATTAGGCTCTGCTTTAGTAGAACAAGGAGCAGGAACAGGTTGAACAGTCTACCCCCCACTTGCTGGAGTTCAAGCTCATTCCGGACCTT CAGTAGACATGGCCATCTTTAGCCTTCATGCGGCAGGTGCTTCCTCCATCATGGGTTCTATGAATTTTCATCACTACTATTTTCAACATGAGAGCACCAGGAATGACCATGGA TCGGTTCCCTCTTCGTTTGAGCTGTACTATCATACGGCAATTCCTTTAGTTCTCTCTTTGCCCGTCTTAGCTGGAGCCATTACTATGTTACTAACTGATCGTAACTTTAATAC CA</p>                                |
| <p>&gt;MAR_MK600509</p> <p>GAACCGCTCTTAGCATGTTGATTGCTTAGAGCTTTCTGGACCAGGAGCTATGTTAGGAGATGACCAAATTTATAATGTCATCGTCAACCGCTCATGCTTTCGTCATGATCTTCTTCTTGGTAATGCCCTGTGATGATGGGTGGCTTCGGAAACTGATTGCTCCCTCTATATATAGGAGCTCCAGATATGGCATTTCCTCGATTAAATAACCTCAGTTTTCGGCTTC TTCTCCCGCCCTCTTTTGTATTAGGCTCTGCTTTAGTAGAACAAGGAGCAGGAACAGGTTGAACAGTCTACCCCCCACTTGCTGGAGTTCAAGCTCATTCCGGACCTT CAGTAGACATGGCCATCTTTAGCCTTCATGCGGCAGGTGCTTCCTCCATCATGGGTTCTATGAATTTTCATCACTACTATTTTCAACATGAGAGCACCAGGAATGACCATGGA TCGGTTCCCTCTTCGTTTGAGCTGTACTATCATACGGCAATTCCTTTAGTTCTCTCTTTGCCCGTCTTAGCTGGAGCCATTACTATGTTACTAACTGATCGTAACTTTAATAC CA</p>                                |
| <p>&gt;MAR_MK600508</p> <p>GAACCGCTCTTAGCATGTTGATTGCTTAGAGCTTTCTGGACCAGGAGCTATGTTAGGAGATGACCAAATTTATAATGTCATCGTCAACCGCTCATGCTTTCGTCATGATCTTCTTCTTGGTAATGCCCTGTGATGATGGGTGGCTTCGGAAACTGATTGCTCCCTCTATATATAGGAGCTCCAGATATGGCATTTCCTCGATTAAATAACCTCAGTTTTCGGCTTC TTCTCCCGCCCTCTTTTGTATTAGGCTCTGCTTTAGTAGAACAAGGAGCAGGAACAGGTTGAACAGTCTACCCCCCACTTGCTGGAGTTCAAGCTCATTCCGGACCTT CAGTAGACATGGCCATCTTTAGCCTTCATGCGGCAGGTGCTTCCTCCATCATGGGTTCTATGAATTTTCATCACTACTATTTTCAACATGAGAGCACCAGGAATGACCATGGA TCGGTTCCCTCTTCGTTTGAGCTGTACTATCATACGGCAATTCCTTTAGTTCTCTCTTTGCCCGTCTTAGCTGGAGCCATTACTATGTTACTAACTGATCGTAACTTTAATAC CA</p>                                |
| <p>&gt;CHN_KF510026</p> <p>GAACCGCTCTTAGCATGTTGATTGCTTAGAGCTTTCTGGACCAGGAGCTATGTTAGGAGATGACCAAATTTATAATGTCATCGTCAACCGCTCATGCTTTCGTCATGATCTTCTTCTTGGTAATGCCCTGTGATGATGGGTGGCTTCGGAAACTGATTGCTCCCTCTATATATAGGAGCTCCAGATATGGCATTTCCTCGATTAAATAACCTCAGTTTTCGGCTTC TTCTCCCGCCCTCTTTTGTATTAGGCTCTGCTTTAGTAGAACAAGGAGCAGGAACAGGTTGAACAGTCTACCCCCCACTTGCTGGAGTTCAAGCTCATTCCGGACCTT CAGTAGACATGGCCATCTTTAGCCTTCATGCGGCAGGTGCTTCCTCCATCATGGGTTCTATGAATTTTCATCACTACTATTTTCAACATGAGAGCACCAGGAATGACCATGGA TCGGTTCCCTCTTCGTTTGAGCTGTACTATCATACGGCAATTCCTTTAGTTCTCTCTTTGCCCGTCTTAGCTGGAGCCATTACTATGTTACTAACTGATCGTAACTTTAATAC CCA</p>                               |
| <p>&gt;CHE_MF000493</p> <p>GAACCGCTCTCAGTATGCTCATTGCTTAGAGCTCTCTGGACCCGGAGCCATGTTAGGAGACGACCAAATCTATAACGTCATCGTCAACCGCTCAGCGTTTCGTCATGATCTCTTTTTGGTGAATGCCCGTGATGATGGGTGGGTTTCGGAAACTGATTGCTCCCTCTATACATAGGAGCCCCGGATATGGCTTTCCTCGATTAAACAATCTCAGTTTCTGACTTCTTCTCCCGCCCTATCTCGTTACTCGGTTCTGCTTTGGTAGAACAAGGAGCAGGTACGGGTTGAACAGTTTATCCCCCACTTGCCGGGTTCAAGCTCATTCTGGCCCT CGGTAGACATGGCCATCTTCAGTCTTCATGCGGCAGGTGCTTCCTCGATCATGGGTTCCATGAACCTTCATCACCACCATCTTTAACATGAGAGCCCCAGGAATGACGATGG ATCGGTAACCTCTGTTCTGTGTAGCCGTACTATCATACAGCCTTCCTTTAGTTCTGTCTTTACCGGTTTAGCTGGAGCCATTACCATGTTGTTGACAGATCGTAAATTTAATA CGA</p>                                   |
| <p>&gt;Unknown_MW543029</p> <p>GAACCGCCCTTAGCATGCTTATTGCTTGGAACTATCGGGACCGGGAGCCATGCTAGGAGACGATCAGATCTACAACGTCATCGTCACTGCTCAGCGTTTCGTCATGATTTCTTCTTGGTCAATGCCGGAATGATGGGTGGATTTCGGAAACTGATTGCTCCCTCTTTACATCGGAGCGCCAGACATGGCCTTTCCTCGATTAAACAACCTCAGTTTCTGGCT CCTCCCTCCTGCCCTCTTCTTATTGCTTGGATCGGCTTTAGTGGAAACAAGGAGCAGGTACAGGTTGGACGGTCTATCCCCCTCTTGCCGGAGTTTCAAGGCTCACTCCGGACC TTCCGTGGATATGGCCATCTTTAGCCTTCATGCGGCCGGTGCCCTCTCTATCATGGGATCCATGAACCTTCATCACCACCATCTTTAACATGAGAGCCCCAGGGATGACCATG GATCGGTTCCCTCTCTTCGTCTGGGAGTACTAATCACGGCCTTCCTTCTGGTTCATCTCTTCCCGTCTTAGCAGGGGCCATCACCATGCTACTCAGGACCGTAACCTCA ACACCA</p>                          |
| <p>&gt;CAN_MW600236</p> <p>GAACCGCCCTTAGCATGCTTATTGCTTGGAACTATCGGGACCGGGAGCCATGCTAGGAGACGATCAGATCTACAACGTCATCGTCACTGCTCAGCGTTTCGTCATGATTTCTTCTTGGTCAATGCCGGAATGATGGGTGGATTTCGGAAACTGATTGCTCCCTCTTTACATCGGAGCGCCAGACATGGCCTTTCCTCGATTAAACAACCTCAGTTTCTGACT</p>                                                                                                                                                                                                                                                                                                                                                                                        |

|                                                                                                                                                                                                                                                                                                                                                                                                                                                                                                                                                                                                                                                           |
|-----------------------------------------------------------------------------------------------------------------------------------------------------------------------------------------------------------------------------------------------------------------------------------------------------------------------------------------------------------------------------------------------------------------------------------------------------------------------------------------------------------------------------------------------------------------------------------------------------------------------------------------------------------|
| <p>TCTTCCCCCTGCCCTCTTCTATTGCTTGGGTCGGCTTTAGTGGAACAAGGAGCAGGTACAGGTTGGACGGTCTATCCCCCTCTTGCCGGAGTTACAGGCCACTCCGGACC</p> <p>TTCCGTGGATATGGCCATCTTTAGCCTTCATGCGGCCGGTGCCCTCTTCTATCATGGGATCCATGAACCTTCATCACCACCATCTTTAACATGAGAGCCCCAGGGATGACCATG</p> <p>GATCGCGTTCTCTCTTCGTCTGAGCAGTGCTAATCACGGCCTTCCTTCTGGTTCATCTCTTCCCGTCTTAGCAGGAGCCATCACCATGCTACTCACGGACCGTAACTTCA</p> <p>ACACCA</p>                                                                                                                                                                                                                                                                       |
| <p>&gt;CAN_ON60485</p> <p>GAACCGCCCTTAGCATGCTTATTGCTTGGAACATATCGGGACCGGGAGCCATGCTAGGAGACGATCAGATCTACAACGTCATCGTCACTGCTCACGCTTTCGTATGATTT</p> <p>TCTTCTTGTCATGCCGGTAATGATGGGTGGATTTCGGAAACTGATTCGTCCCTCTTTACATCGGAGCGCCAGACATGGCCTTTCCTCGATTAAACAACCTCAGTTTCTGACT</p> <p>TCTTCCCCCTGCCCTCTTCTATTGCTTGGGTCGGCTTTAGTGGAACAAGGAGCAGGTACAGGTTGGACGGTCTATCCCCCTCTTGCCGGAGTTACAGGCCACTCCGGACC</p> <p>TTCCGTGGATATGGCCATCTTTAGCCTTCATGCGGCCGGTGCCCTCTTCTATCATGGGATCCATGAACCTTCATCACCACCATCTTTAACATGAGAGCCCCAGGGATGACCATG</p> <p>GATCGCGTTCTCTCTTCGTCTGAGCAGTGCTAATCACGGCCTTCCTTCTGGTTCATCTCTTCCCGTCTTAGCAGGAGCCATCACCATGCTACTCACGGACCGTAACTTCA</p> <p>ACACCA</p>  |
| <p>&gt;SGP_OK037612</p> <p>GAACCGCCCTTAGCATGCTTATTGCTTGGAACATATCGGGACCGGGAGCCATGCTAGGAGACGATCAGATCTACAACGTCATCGTCACTGCTCACGCTTTCGTATGATTT</p> <p>TCTTCTTGTCATGCCGGTAATGATGGGTGGATTTCGGAAACTGATTCGTCCCTCTTTACATCGGAGCGCCAGACATGGCCTTTCCTCGATTAAACAACCTCAGTTTCTGACT</p> <p>CCTCCCTCTCGCCCTCTTCTATTGCTTGGATCGGCTTTAGTGGAACAAGGAGCAGGTACAGGTTGGACGGTCTATCCCCCTCTTGCCGGAGTTACAGGCTCACTCCGGACC</p> <p>TTCCGTGGATATGGCCATCTTTAGCCTTCATGCGGCCGGTGCCCTCTTCTATCATGGGATCCATGAACCTTCATCACCACCATCTTTAACATGAGAGCCCCAGGGATGACCATG</p> <p>GATCGCGTTCTCTCTTCGTCTGGGAGTACTAATCACGGCCTTCCTTCTGGTTCATCTCTTCCCGTCTTAGCAGGAGCCATCACCATGCTACTCACGGACCGTAACTTCA</p> <p>ACACCA</p> |
| <p>&gt;JPN_OK037607</p> <p>GAACCGCCCTTAGCATGCTTATTGCTTGGAACATATCGGGACCGGGAGCCATGCTAGGAGACGATCAGATCTACAACGTCATCGTCACTGCTCACGCTTTCGTATGATTT</p> <p>TCTTCTTGTCATGCCGGTAATGATGGGTGGATTTCGGAAACTGATTCGTCCCTCTTTACATCGGAGCGCCAGACATGGCCTTTCCTCGATTAAACAACCTCAGTTTCTGACT</p> <p>TCTTCCCCCTGCCCTCTTCTATTGCTTGGGTCGGCTTTAGTGGAACAAGGAGCAGGTACAGGTTGGACGGTCTATCCCCCTCTTGCCGGAGTTACAGGCCACTCCGGACC</p> <p>TTCCGTGGATATGGCCATCTTTAGCCTTCATGCGGCCGGTGCCCTCTTCTATCATGGGATCCATGAACCTTCATCACCACCATCTTTAACATGAGAGCCCCAGGGATGACCATG</p> <p>GATCGCGTTCTCTCTTCGTCTGAGCAGTGCTAATCACGGCCTTCCTTCTGGTTCATCTCTTCCCGTCTTAGCAGGAGCCATCACCATGCTACTCACGGACCGTAACTTCA</p> <p>ACACCA</p> |
| <p>&gt;CHN_MT806195</p> <p>GAACCGCCCTTAGCATGCTTATTGCTTGGAACATATCGGGACCGGGAGCCATGCTAGGAGACGATCAGATCTACAACGTCATCGTCACTGCTCACGCTTTCGTATGATTT</p> <p>TCTTCTTGTCATGCCGGTAATGATGGGTGGATTTCGGAAACTGATTCGTCCCTCTTTACATCGGAGCGCCAGACATGGCCTTTCCTCGATTAAACAACCTCAGTTTCTGGCT</p> <p>CCTCCCTCTCGCCCTCTTCTATTGCTTGGATCGGCTTTAGTGGAACAAGGAGCAGGTACAGGTTGGACGGTCTATCCCCCTCTTGCCGGAGTTACAGGCTCACTCCGGACC</p> <p>TTCCGTGGATATGGCCATCTTTAGCCTTCATGCGGCCGGTGCCCTCTTCTATCATGGGATCCATGAACCTTCATCACCACCATCTTTAACATGAGAGCCCCAGGGATGACCATG</p> <p>GATCGCGTTCTCTCTTCGTCTGGGAGTACTAATCACGGCCTTCCTTCTGGTTCATCTCTTCCCGTCTTAGCAGGAGCCATCACCATGCTACTCACGGACCGTAACTTCA</p> <p>ACACCA</p> |
| <p>&gt;JPN_OK037606</p> <p>GAACCGCCCTTAGCATGCTTATTGCTTGGAACATATCGGGACCGGGAGCCATGCTAGGAGACGATCAGATCTACAACGTCATCGTCACTGCTCACGCTTTCGTATGATTT</p> <p>TCTTCTTGTCATGCCGGTAATGATGGGTGGATTTCGGAAACTGATTCGTCCCTCTTTACATCGGAGCGCCAGACATGGCCTTTCCTCGATTAAACAACCTCAGTTTCTGACT</p> <p>TCTTCCCCCTGCCCTCTTCTATTGCTTGGGTCGGCTTTAGTGGAACAAGGAGCAGGTACAGGTTGGACGGTCTATCCCCCTCTTGCCGGAGTTACAGGCCACTCCGGACC</p> <p>TTCCGTGGATATGGCCATCTTTAGCCTTCATGCGGCCGGTGCCCTCTTCTATCATGGGATCCATGAACCTTCATCACCACCATCTTTAACATGAGAGCCCCAGGGATGACCATG</p> <p>GATCGCGTTCTCTCTTCGTCTGAGCAGTGCTAATCACGGCCTTCCTTCTGGTTCATCTCTTCCCGTCTTAGCAGGAGCCATCACCATGCTACTCACGGACCGTAACTTCA</p> <p>ACACCA</p> |
| <p>&gt;JPN_OK037605</p> <p>GAACCGCCCTTAGCATGCTTATTGCTTGGAACATATCGGGACCGGGAGCCATGCTAGGAGACGATCAGATCTACAACGTCATCGTCACTGCTCACGCTTTCGTATGATTT</p> <p>TCTTCTTGTCATGCCGGTAATGATGGGTGGATTTCGGAAACTGATTCGTCCCTCTTTACATCGGAGCGCCAGACATGGCCTTTCCTCGATTAAACAACCTCAGTTTCTGACT</p> <p>TCTTCCCCCTGCCCTCTTCTATTGCTTGGGTCGGCTTTAGTGGAACAAGGAGCAGGTACAGGTTGGACGGTCTATCCCCCTCTTGCCGGAGTTACAGGCCACTCCGGACC</p> <p>TTCCGTGGATATGGCCATCTTTAGCCTTCATGCGGCCGGTGCCCTCTTCTATCATGGGATCCATGAACCTTCATCACCACCATCTTTAACATGAGAGCCCCAGGGATGACCATG</p> <p>GATCGCGTTCTCTCTTCGTCTGAGCAGTGCTAATCACGGCCTTCCTTCTGGTTCATCTCTTCCCGTCTTAGCAGGAGCCATCACCATGCTACTCACGGACCGTAACTTCA</p> <p>ACACCA</p> |
| <p>&gt;CHN_MT884060</p> <p>GAACCGCCCTTAGCATGCTTATTGCTTGGAACATATCGGGACCGGGAGCCATGCTAGGAGACGATCAGATCTACAACGTCATCGTCACTGCTCACGCTTTCGTATGATTT</p> <p>TCTTTTGTCATGCCGGTAATGATGGGTGGATTTCGGAAACTGATTCGTCCCTCTTTACATCGGAGCGCCAGACATGGCCTTTCCTCGATTAAACAACCTCAGTTTCTGACT</p> <p>CCTTCTCTCTGCCCTCTTCTATTGCTTGGGTCGGCTTTAGTGGAACAAGGAGCAGGTACAGGTTGGACGGTCTATCCCCCTCTTGCCGGAGTTACAGGCCACTCCGGACC</p> <p>TTCCGTGGATATGGCCATCTTTAGCCTTCATGCGGCCGGTGCCCTCTTCTATCATGGGATCCATGAACCTTCATCACCACCATCTTTAACATGAGAGCCCCAGGGATGACCATG</p> <p>GATCGCGTTCTCTCTTCGTCTGGGAGTACTAATCACGGCCTTCCTTCTGGTTCATCTCTTCCCGTCTTGGCAGGAGCCATCACCATGCTACTCACGGACCGTAACTTCA</p> <p>ACACCA</p>   |
| <p>&gt;GRE_KP231217</p> <p>GAACCGCCCTTAGCATGCTTATTGCTTGGAACATATCGGGACCGGGAGCCATGCTAGGAGACGATCAGATCTACAACGTTATCGTCACTGCTCACGCTTTCGTATGATTT</p> <p>TCTTCTTGTCATGCCGGTAATGATGGGTGGATTTCGGAAACTGATTCGTCCCTCTTTACATCGGAGCGCCAGACATGGCCTTTCCTCGATTAAACAACCTCAGTTTCTGACT</p> <p>CCTCCCTCTCGCCCTCTTCTATTGCTTGGATCGGCTTTAGTGGAACAAGGAGCAGGTACAGGTTGGACGGTCTATCCCCCTCTTGCCGGAGTTACAGGCTCACTCCGGACC</p> <p>TTCCGTGGATATGGCCATCTTTAGCCTTCATGCGGCCGGTGCCCTCTTCTATCATGGGATCCATGAACCTTCATCACCACCATCTTTAACATGAGAGCCCCAGGGATGACCATG</p> <p>GATCGCGTTCTCTCTTCGTCTGGGAGTACTAATCACGGCCTTCCTTCTGGTTCATCTCTTCCCGTCTTAGCAGGAGCCATCACCATGCTACTCACGGACCGTAACTTCA</p> <p>ACACCA</p> |
| <p>&gt;DEU_FJ423613</p> <p>GAACCGCTCTTAGCATGTTGATTGCTTAGAGCTTCTGGACCAGGAGCTATGTTAGGAGATGACCAAATTTATAATGTCATCGTACCGCTCATGCTTTCGTATGATCTT</p> <p>CTTCTTGGAATGCCTGTGATGATGGGTGGCTTCGGAAACTGATTCGTCCCTCTATATATAGGAGCTCCAGATATGGCATTTCCCTCGATTAAATAACCTCAGTTTTCGGCTTC</p> <p>TTCTTCCCGCCCTCTTTTGTATTAGGCTCTGCTTTAGTAGAACAAGGAGCAGGAACAGGTTGAACAGTCTACCCCCCACTTGCTGGAGTTCAAGCTCATTCCGGACCTT</p> <p>CAGTAGACATGGCCATCTTAGCCTTCATGCGGCAGGTGCTTCTCCATCATGGGTTCTATGAATTTATCACTACTATTTTAAACATGAGAGCACCAGGAATGACCATGGA</p> <p>TCGGTTCCTCTTTCGTTGAGCTGACTATCACGGCATTCCTTTAGTTCTCTTTCGCCGTCTTAGCTGGAGCCATTACTATGTTACTAACTGATCGTAACTTTAATAC</p> <p>CA</p>                |
| <p>&gt;JPN_MZ326744</p> <p>GAACCGCTCTCAGTATGCTCATTGCTTAGAGCTCTCTGGACCCGGAGCCATGTTAGGAGACGACCAAATCTATAACGTCATCGTACCGCTCACGCTTTCGTATGATCT</p> <p>TCTTTTGGTGATGCCCGTGATGATGGGTGGGTCGGAAACTGATTCGTCCCTCTATACATAGGAGCCCCGGATATGGCTTTCCTCGATTAAACAATCTCAGTTTCTGACTT</p> <p>CTTCTCCCGCCCTATTCGTGTTACTCGGTTCTGCTTTGGTAGAACAAGGAGCAGGTACGGGTTGAACAGTTTATCCCCCACTTGCCGGGGTTCAAGCTCATTCTGCCCCCT</p> <p>CGGTAGACATGGCCATCTCAGTCTTCATGCGGCAGGTGCTTCTCGATCATGGGTTCCATGAACCTTCATCACCACCATCTTTAACATGAGAGCCCCAGGAATGACGATGG</p> <p>ATCGCGTACCTCTGTTCGTGTGAGCCGTACTCATCACAGCCTTCCTTTAGTTCTGTCTTTACCGGTTTAGCTGGAGCCATTACCATGTTGTTGACAGATCGTAAITTCATA</p> <p>CGA</p>          |
| <p>&gt;Unknown_MZ146922</p> <p>GAACCGCTCTCAGTATGCTCATTGCTTAGAGCTCTCTGGACCCGGAGCCATGTTAGGAGACGACCAAATCTATAACGTCATCGTACCGCTCACGCTTTCGTATGATCT</p> <p>TCTTTTGGTGATGCCCGTGATGATGGGTGGGTCGGAAACTGATTCGTCCCTCTATACATAGGAGCCCCGGATATGGCTTTCCTCGATTAAACAATCTCAGTTTCTGACTT</p> <p>CTTCTCCCGCCCTATTCGTGTTACTCGGTTCTGCTCTGGTAGAACAAGGAGCAGGTACGGGTTGAACAGTTTATCCCCCACTTGCCGGGGTTCAAGCTCATTCTGCCCCCT</p> <p>CGGTAGACATGGCCATCTCAGTCTTCATGCGGCAGGTGCTTCTCGATCATGGGTTCCATGAACCTTCATCACCACCATCTTTAACATGAGAGCCCCAGGAATGACGATGG</p> <p>ATCGCGTACCTCTGTTCGTGTGAGCCGTACTCATCACAGCCTTCCTTTAGTTCTGTCTTTACCGGTTTAGCTGGAGCCATTACCATGTTGTTGACAGATCGTAAITTCATA</p> <p>CGA</p>      |
| <p>&gt;Unknown_MZ569028</p> <p>GGACCGCTCTTAGCATGCTGATTGCTTAGAGCTCTCGGACCCAGGGCCATGTTAGGAGACGACAGATCTACAACGTCATCGTACCGGCCACGCTTTCGTATGATC</p> <p>TCTTCTTGGTGATGCCCGTAATGATGGGTGGATTTCGGAAACTGATTCGTCCCTCTTACATCGGAGCACCAGACATGGCTTTCCTCGATTAAACAATCTCAGTTTCTGACT</p> <p>TCTTACCTCCCGCCCTCTTCTATTGCTTGATCGGCTCTAGTAGAACAAGGAGCAGGAACGGGTTGGACGGTCTATCCCCCTCTCGCCGGGGTTACGGTCTATCCGGGC</p> <p>CTTCGGTAGACATGGCCATCTCAGCCTTACCGCGGCTGGTGCCCTCTATCATGGGATCCATGAATTCATCACCACCATCTTTAACATGAGAGCCCCAGGGATGACGA</p>                                                                                                                                                |

|                                                                                                                                                                                                                                                                                                                                                                                                                                                                                                                                                                                                                     |
|---------------------------------------------------------------------------------------------------------------------------------------------------------------------------------------------------------------------------------------------------------------------------------------------------------------------------------------------------------------------------------------------------------------------------------------------------------------------------------------------------------------------------------------------------------------------------------------------------------------------|
| TGGATCGAGTCCCTCTCTTCGTTGAGCAGTGCTAATCACGGCCTTTCTGTTAGTCCTCTCTCTACCCGTTTTAGCGGGGGCCATACCATGTGTCTACGGATCGTAATTTCAACACCA                                                                                                                                                                                                                                                                                                                                                                                                                                                                                               |
| >Unknown_MZ569031<br>GAACCGCCCTTAGCATGCTTATTCGCTTGAACTATCGGGACCGGGAGCCATGCTAGGAGACGATCAGATCTACAACGTCATCGTCACTGCTCACGCTTTTCGTCATGATTTCTTCTTGGTCATGCCGGAATGATGGGTGGATTTCGAAACTGATTTCCTCCCTCTTTACATCGGAGCGCCAGACATGGCTTTTCTCGATTAAATAACCTCAGTTTCTGGCTCTTCCCTCCTGGCCTCTTCTATTGCTTGGATCGGCTTTAGTGGAACAAGGAGCAGGTACAGGTTGGACGGTCTATCCCCCTCTTGGCGGAGTTCAGGGCTCACTCCGGACC TTCCGTGGATATGGCCATCTTTAGCCTTCATGCGGCCGGTGCCCTCTCTATCATGGGATCCATGAACCTTCATCACCACCATCTTTAACATGAGAGCCCCAGGGATGACCATG GATCGCGTTCTCTCTTCGTCCTGGGAGTACTAATCACGGCCTTCCTTCGTTTCTATCTCTCCCCGCTTAGCAGGGGCCATACCATGCTACTCACGGACCGTAACTTCAACACCA              |
| >Unknown_MZ569029<br>GAACCGCCCTTAGCATGCTTATTCGCTTGAACTATCGGGACCGGGAGCCATGCTAGGAGACGATCAGATCTACAACGTCATCGTCACTGCTCACGCTTTTCGTCATGATTTCTTCTTGGTCATGCCGGAATGATGGGTGGATTTCGAAACTGATTTCCTCCCTCTTTACATCGGAGCGCCAGACATGGCTTTTCTCGATTAAATAACCTCAGTTTCTGGCTCTTCCCTCCTGGCCTCTTCTATTGCTTGGATCGGCTTTAGTGGAACAAGGAGCAGGTACAGGTTGGACGGTCTATCCCCCTCTTGGCGGAGTTCAGGGCTCACTCCGGACC TTCCGTGGATATGGCCATCTTTAGCCTTCATGCGGCCGGTGCCCTCTCTATCATGGGATCCATGAACCTTCATCACCACCATCTTTAACATGAGAGCCCCAGGGATGACCATG GATCGCGTTCTCTCTTCGTCCTGGGAGTACTAATCACGGCCTTCCTTCGTTTCTATCTCTCCCCGCTTAGCAGGGGCCATACCATGCTACTCACGGACCGTAACTTCAACACCA              |
| >Unknown_MZ569027<br>GAACCGCCCTTAGCATGCTTATTCGCTTGAACTATCGGGACCGGGAGCCATGCTAGGAGACGATCAGATCTACAACGTCATCGTCACTGCTCACGCTTTTCGTCATGATTTCTTCTTGGTCATGCCGGAATGATGGGTGGATTTCGAAACTGATTTCCTCCCTCTTTACATCGGAGCGCCAGACATGGCTTTTCTCGATTAAATAACCTCAGTTTCTGGCTCTTCCCTCCTGGCCTCTTCTATTGCTTGGATCGGCTTTAGTGGAACAAGGAGCAGGTACAGGTTGGACGGTCTATCCCCCTCTTGGCGGAGTTCAGGGCTCACTCCGGACC TTCCGTGGATATGGCCATCTTTAGCCTTCATGCGGCCGGTGCCCTCTCTATCATGGGATCCATGAACCTTCATCACCACCATCTTTAACATGAGAGCCCCAGGGATGACCATG GATCGCGTTCTCTCTTCGTCCTGGGAGTACTAATCACGGCCTTCCTTCGTTTCTATCTCTCCCCGCTTAGCAGGGGCCATACCATGCTACTCACGGACCGTAACTTCAACACCA              |
| >CZE_MZ508275<br>GAACCGCCCTTAGCATGCTTATTCGCTTGAACTATCGGGACCGGGAGCCATGCTAGGAGACGATCAGATCTACAACGTCATCGTCACTGCTCACGCTTTTCGTCATGATTTCTTCTTGGTCATGCCGGAATGATGGGTGGATTTCGAAACTGATTTCCTCCCTCTTTACATCGGAGCGCCAGACATGGCTTTTCTCGATTAAATAACCTCAGTTTCTGACTCTTCCCTCCTGGCCTCTTCTATTGCTTGGATCGGCTTTAGTGGAACAAGGAGCAGGTACAGGTTGGACGGTCTATCCCCCTCTTGGCGGAGTTCAGGGCTCACTCCGGACC TTCCGTGGATATGGCCATCTTTAGCCTTCATGCGGCCGGTGCCCTCTCTATCATGGGATCCATGAACCTTCATCACCACCATCTTTAACATGAGAGCCCCAGGGATGACCATG GATCGCGTTCTCTCTTCGTCCTGGGAGTACTAATCACGGCCTTCCTTCGTTTCTATCTCTCCCCGCTTAGCAGGAGCCATACCATGCTACTCACGGACCGTAACTTCAACACCA                  |
| >CHN_JN593332<br>GAACCGCCCTTAGCATGCTTATTCGCTTGAACTATCGGGACCGGGAGCCATGCTAGGAGACGATCAGATCTACAACGTCATCGTCACTGCTCACGCTTTTCGTCATGATTTCTTCTTGGTCATGCCGGAATGATGGGTGGATTTCGAAACTGATTTCCTCCCTCTTTACATCGGAGCGCCAGACATGGCTTTTCTCGATTAAATAACCTCAGTTTCTGACTCTTCCCTCCTGGCCTCTTCTATTGCTTGGATCGGCTTTAGTGGAACAAGGAGCAGGTACAGGTTGGACGGTCTATCCCCCTCTTGGCGGAGTTCAGGGCTCACTCCGGACC TTCCGTGGATATGGCCATCTTTAGCCTTCATGCGGCCGGTGCCCTCTCTATCATGGGATCCATGAACCTTCATCACCACCATCTTTAACATGAGAGCCCCAGGGATGACCATG GATCGCGTTCTCTCTTCGTCCTGGGAGTACTAATCACGGCCTTCCTTCGTTTCTATCTCTCCCCGCTTAGCAGGAGCCATACCATGCTACTCACGGACCGTAACTTCAACACCA                  |
| >DEU_MZ508276<br>GAACCGCCCTTAGCATGCTTATTCGCTTGAACTATCGGGACCGGGAGCCATGCTAGGAGACGATCAGATCTACAACGTCATCGTCACTGCTCACGCTTTTCGTCATGATTTCTTCTTGGTCATGCCGGAATGATGGGTGGATTTCGAAACTGATTTCCTCCCTCTTTACATCGGAGCGCCAGACATGGCTTTTCTCGATTAAATAACCTCAGTTTCTGACTCTTCCCTCCTGGCCTCTTCTATTGCTTGGATCGGCTTTAGTGGAACAAGGAGCAGGTACAGGTTGGACGGTCTATCCCCCTCTTGGCGGAGTTCAGGGCCACTCCGGACC TTCCGTGGATATGGCCATCTTTAGCCTTCATGCGGCCGGTGCCCTCTCTATCATGGGATCCATGAACCTTCATCACCACCATCTTTAACATGAGAGCCCCAGGGATGACCATG GATCGCGTTCTCTCTTCGTCCTGGGAGTACTAATCACGGCCTTCCTTCGTTTCTATCTCTCCCCGCTTAGCAGGAGCCATACCATGCTACTCACGGACCGTAACTTCAACACCA                   |
| >Unknown_MZ569030<br>GAACCGCCCTTAGCATGCTTATTCGCTTGAACTATCGGGACCGGGAGCCATGCTAGGAGACGATCAGATCTACAACGTCATCGTCACTGCTCACGCTTTTCGTCATGATTTCTTTTTGGTCATGCCGGAATGATGGGTGGATTTCGAAACTGATTTCCTCCCTCTTTACATCGGAGCGCCAGACATGGCTTTTCTCGATTAAATAACCTCAGTTTCTGACTCTTCTCTCTGCCCTCTTCTATTGCTTGGGTTCGGCTTTAGTGGAACAAGGAGCAGGTACAGGTTGGACGGTCTATCCCCCTCTTGGCGGAGTTCAGGGCCACTCCGGACC TTCCGTGGATATGGCCATCTTTAGCCTTCATGCGGCCGGTGCCCTCTCTATCATGGGATCCATGAACCTTCATCACCACCATCTTTAACATGAGAGCCCCAGGGATGACCATG GATCGCGTTCTCTCTTCGTCCTGGGAGTACTAATCACGGCCTTCCTTCGTTTCTATCTCTCCCCGCTTAGCAGGAGCCATACCATGCTACTCACGGACCGTAACTTCAACACCA               |
| >DEU_MZ508273<br>GAACCGCTCTTAGCATGTTGATTTCGCTTAGAGCTTTCTGGACCAGGAGCTATGTTAGGAGATGACCAAATTTATAATGTATCGTCACCGCTCATGCTTTTCGTCATGATCTTCTTCTTGGTAATGCCTGTGATGATGGGTGGCTTCGGAACCTGATTTCCTCCCTCTATATATAGGAGCTCCAGATATGGCATTTCTCGATTAAATAACCTCAGTTTTCGGCTTC TTCTCCCGCCCTCTTTTGTATTAGGCTCTGCTTATAGTAGAACAAGGAGCAGGAACAGGTTGAACAGTCTACCCCCACTTGCTGGAGTTCAAGCTCATTCCGGACCTT CAGTAGACATGGCCATCTTTAGCCTTCATGCGGCAGGTGCTTCTCCATCATGGGTCTATGAATTTTCATCTACTACTATTTTCAACATGAGAGCACCAGGAATGACCATGGA TCGCGTTCCCTCTTCGTTTGTAGCTGTACTATCATCAGGCATTCTTTAGTCTCTCTTTGCCGCTTAGCTGGAGCCATTACTATGTACTAACTGATCGTAACCTTTAATACCA                  |
| >USA_ON606476<br>GAACCGCCCTTAGCATGCTTATTCGCTTGAACTATCGGGACCGGGAGCCATGCTAGGAGACGATCAGATCTACAACGTCATCGTCACTGCTCACGCTTTTCGTCATGATTTCTTCTTGGTCATGCCGGAATGATGGGTGGATTTCGAAACTGATTTCCTCCCTCTTTACATCGGAGCGCCAGACATGGCTTTTCTCGATTAAATAACCTCAGTTTCTGACTCTTCTCTCTGCCCTCTTCTATTGCTTGGGTTCGGCTTTAGTGGAACAAGGAGCAGGTACAGGTTGGACGGTCTATCCCCCTCTTGGCGGAGTTCAGGGCCACTCCGGACC TTCCGTGGATATGGCCATCTTTAGCCTTCATGCGGCCGGTGCCCTCTCTATCATGGGATCCATGAACCTTCATCACCACCATCTTTAACATGAGAGCCCCAGGGATGACCATG GATCGCGTTCTCTCTTCGTCCTGGGAGTACTAATCACGGCCTTCCTTCGTTTCTATCTCTCCCCGCTTAGCAGGAGCCATACCATGCTACTCACGGACCGTAACTTCAACACCA                   |
| >AF383926_Maeotias_marginata<br>GAACAGCTCTAAGCATGCTTATTCGTTTAGAATTATCTGGCCAGGAGCTATGTTAGGAGATGATCAAATTTATAATGTTATCGTTACCGCTCATGCTTTCGTTATGATTTTCT TCTTAGTTATGCTGTGTTTATGATGGGAGGGTTTGGAAATTGATTGTACCAITATATATAGGTGCACCTGATATGGCTTTTCCAAGATTAAATAATTTAAGTTTTGATTACTACC TCCTGCTTTATTTTACTTTTAGGTTCTTCTTTAGTAGAACAAGGTGCTGGAACAGGTTGAACCTGTGTATCCACCATTAGCTAGTTTCAAGCTCATTAGGACCTTCTGTAG ATATGGCTATTTTATGCTTCATGCAGCCGAGCTTCATCTATAATGGGATCTATGAATTTCACTACTACCATTTTAAATATGAGAGCCCCAGGAATGACTATGGATAGAGTTT CTTTGTTTGTATGAGCTGTTTAAATAACAGCTTTTCTTCTTTATTTATCTTACCTGTCTTGCTGGAGCTAATTACAATGTTATTAACTGACCGTAATTTTAAATACAA |
